# Supplementary material
Source: PubMed Central journal article supplement (PMC5210714)
Supplement: supp_pp.16.01024_PP2016-01024DR1_Supplemental_Materialfig.pdf [file supp_pp.16.01024_PP2016-01024DR1_Supplemental_Materialfig.pdf]

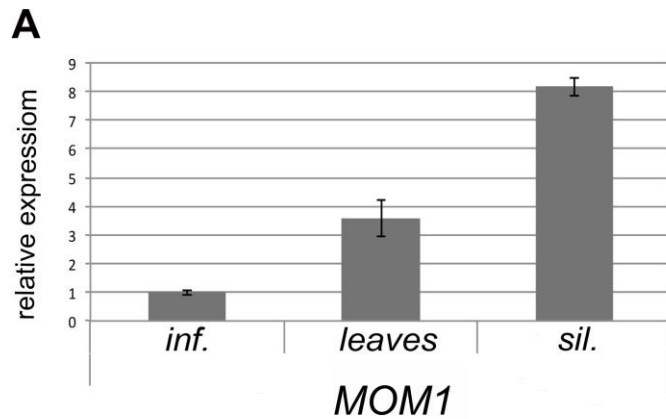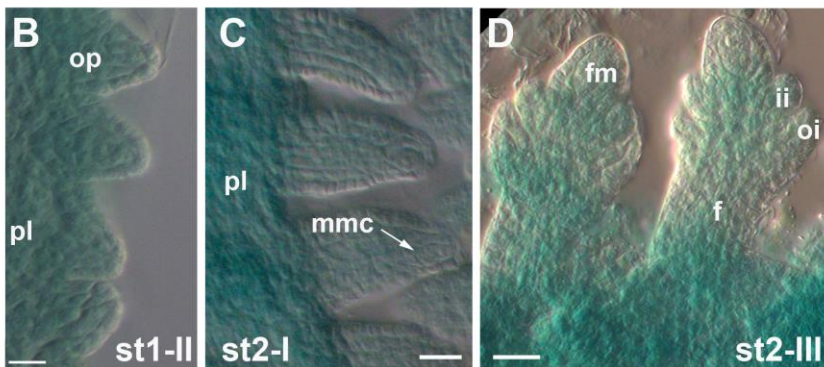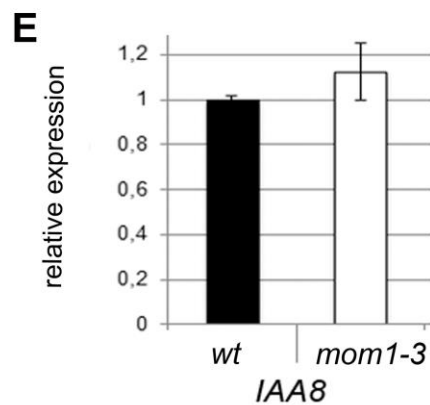

**Supplemental Figure 1. *MOM1* expression pattern**

(A) Quantitative RT-PCR analyses to monitor *MOM1* expression in leaves, inflorescences, and developing siliques (4-8 DAF). Error bars stand for s.e.m..

(B-D) GUS activity driven by *pMOM1::GUS* is detected in developing ovules, ovule stages are indicated (ovule stage according Schneitz et al., 1995)

(E) *IAA8* is similarly expressed in wild type and *mom1-3* inflorescences. Error bars stand for s.e.m..

fm, functional megaspore female gametophyte; f, funiculus; ii, inner integument; oi, outer integument; op, ovule primordium; pl, placenta;

Scale bars: 20 μm
