# Supplementary material
Source: PubMed Central journal article supplement (PMC5210714)
Supplement: supp_pp.16.01024_PP2016-01024DR1_Supplemental_Materialtbls.pdf [file supp_pp.16.01024_PP2016-01024DR1_Supplemental_Materialtbls.pdf]

**Supplemental Table S1. Predicted transcription factor binding sites for TATA binding protein (TBP).**

TBP sites, mapped in the -500 upstream region of *ECI* genes. Predictions are according to AthMap (<http://www.athmap.de/index.php>). The sequence logo of TBP DNA binding motif (Franco-Zorilla et al., 2014) is shown below.

| Gene        | Factor | Family  | Position | Relative orientation | Relative distance | Max. Score | Threshold Score | Score |
|-------------|--------|---------|----------|----------------------|-------------------|------------|-----------------|-------|
| At1g76750.1 | TBP    | - other | 28815898 | +                    | -36               | 10.98      | 5.16            | 7.6   |
| At2g21740.1 | TBP    | - other | 9289511  | +                    | -68               | 10.98      | 5.16            | 7.11  |
| At2g21740.1 | TBP    | - other | 9289664  | +                    | -221              | 10.98      | 5.16            | 5.16  |
| At2g21750.1 | TBP    | - other | 9290888  | +                    | -64               | 10.98      | 5.16            | 8.09  |
| At4g39340.1 | TBP    | - other | 18293561 | +                    | -55               | 10.98      | 5.16            | 10.44 |
| At5g64720.1 | TBP    | - other | 25890092 | +                    | -53               | 10.98      | 5.16            | 6.88  |

Name: TBP

Logo:

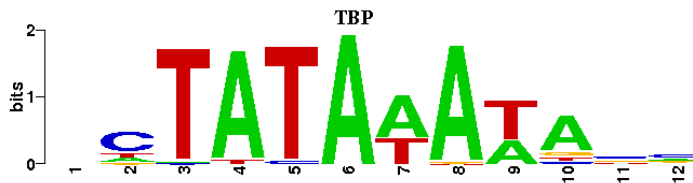

Matrix:

|   |  |    |     |     |     |     |     |     |     |     |     |    |    |
|---|--|----|-----|-----|-----|-----|-----|-----|-----|-----|-----|----|----|
| A |  | 48 | 27  | 5   | 162 | 0   | 171 | 106 | 166 | 65  | 125 | 22 | 51 |
| C |  | 46 | 108 | 2   | 0   | 7   | 0   | 0   | 0   | 2   | 14  | 72 | 72 |
| G |  | 29 | 9   | 0   | 0   | 0   | 0   | 0   | 3   | 0   | 17  | 48 | 27 |
| T |  | 48 | 27  | 164 | 9   | 164 | 0   | 65  | 2   | 104 | 15  | 31 | 19 |

Max. score: 10.98

Threshold: 5.16

**Supplemental Table S2. List of proteins able to bind the *EC1.1* promoter in yeast.**

The proteins listed have been found more than once as *pEC1.1* interactors.

| <b>Accession</b>              | <b>Description</b>                       |
|-------------------------------|------------------------------------------|
| At1g0782/ At1g07820/At3g53730 | Histone 4                                |
| At2g46980                     | ASY3, a coiled-coil domain protein       |
| At1g07820                     | Histone superfamily protein              |
| At1g69690                     | AtTCP15                                  |
| At1g01960                     | Embryo sac Development Arrest 10 (EDA10) |
| At1g30970                     | SUF4                                     |
| At5g62470                     | Myb 96                                   |
| At3g27670                     | RESURRECTION1, RST1                      |
| At5g22880                     | Histone H2B                              |

**Supplemental Table S3. SUF4 affects activity of *EC1.1* and *EC1.2* promoters.**

GUS analyses performed with mature ovules of F1, obtained by crossing homozygous *suf4-1* mutants with homozygous *pEC1.1(-457)::GUS* or *pEC1.2(-893)::GUS* lines (*suf4-1 suf4-1xpEC1.1(-457)::GUS pEC1.1(-457)::GUS* and *suf4-1 suf4-1xpEC1.2(-893)::GUS*). Note that the  $\chi^2$  statistics indicate that SUF4 regulates expression of *pEC1.1(-457)::GUS*, as well as *pEC1.2(-893)::GUS*.

| Genotypes                            | Ovules           |                  |       |                  |                  | $\chi^2$<br>value* | p-value    |
|--------------------------------------|------------------|------------------|-------|------------------|------------------|--------------------|------------|
|                                      | observed<br>GUS+ | observed<br>GUS- | total | expected<br>GUS+ | expected<br>GUS- |                    |            |
| <i>SUF suf4-1<br/>EC1.1::GUS +/-</i> | 356<br>25,6%     | 1,036<br>74,4%   | 1,392 | 348<br>25%       | 1,044<br>75%     | 0.24               | 0.5<P<0.75 |
| <i>SUF suf4-1<br/>EC1.2::GUS +/-</i> | 301<br>24,6%     | 924<br>75,4%     | 1,225 | 306.3<br>25%     | 918.7<br>75%     | 0.12               | 0.5<P<0.75 |

GUS+, GUS positive ovules; GUS-, GUS negative ovules

**Supplemental Table S4.** List of genes co-expressed with *SUF4*.

| Accession        | Description                                                  | Pearson coefficient (Log) |
|------------------|--------------------------------------------------------------|---------------------------|
| At1g30970        | Zinc finger (C2H2 type) family protein, contains Pfam domain | 1                         |
| At1g78930        | Mitochondrial transcription termination factor-related /     | 0,6780                    |
| At5g63200        | Tetratricopeptide repeat (TPR)- protein                      | 0,6676                    |
| At1g50910        | Unknown protein                                              | 0,6624                    |
| At5g47400        | Unknown protein                                              | 0,6601                    |
| <b>At1g08060</b> | <b>MOM1</b>                                                  | <b>0,6555</b>             |
| At3g44530        | Transducin family protein                                    | 0,6551                    |
| At4g18600        | Unknown protein                                              | 0,6484                    |
| At5g06100        | Myb transcription factor (MYB33)                             | 0,6471                    |
| At2g35540        | DNAJ heat shock                                              | 0,6455                    |
| At2g47820        | Expressed protein                                            | 0,6441                    |
| At5g20200        | Nucleoporin-related protein                                  | 0,6407                    |
| At5g18770        | F-box protein                                                | 0,6381                    |
| At1g77410        | Putative beta-galactosidase                                  | 0,6378                    |
| At2g43980        | Inositol 1,3,4-trisphosphate 5/6-kinase                      | 0,6353                    |
| At4g35930        | F-box family protein                                         | 0,6345                    |
| At5g05350        | Unknown protein                                              | 0,6295                    |
| At5g05130        | SNF2 domain-containing protein /                             | 0,6268                    |
| At4g25540        | DNA mismatch repair protein (MSH3)                           | 0,6254                    |
| At1g52620        | Pentatricopeptide (PPR) repeat-containing protein            | 0,6248                    |
| At5g13470        | Unknown protein                                              | 0,6222                    |
| At2g40950        | bZIP transcription factor                                    | 0,6206                    |
| At2g28330        | Unknown protein                                              | 0,6200                    |

**Supplemental Table S5.** Primers used in this work.

| Name                     | Sequence                                 |
|--------------------------|------------------------------------------|
| <b>Promoter analysis</b> |                                          |
| EC1.2p(-869)_fw(PstI)    | TGATTACGCCCTGCAGCGTTTATACAAGGACAGAG      |
| EC1.2p(-750)_fw(PstI)    | TGATTACGCCCTGCAGAGGTAACCTGTCCAAGAAG      |
| EC1.2p(-631)_fw(PstI)    | TGATTACGCCCTGCAGTATATTTGTATTTCGAGATTGTG  |
| EC1.2p(-502)fw(PstI)     | TGATTACGCCCTGCAGCACATCGACAACACTATAGC     |
| EC1.2p(-374)_fw(PstI)    | TGATTACGCCCTGCAGCATAAAGTTCAATGAGTAGT     |
| EC1.2p(-252)_fw(PstI)    | TGATTACGCCCTGCAGCGCTACTGATTCAACATG       |
| EC1.2p(-222)_fw(PstI)    | TGATTACGCCCTGCAGCTAAATACGTTTCTACAGTCAAA  |
| EC1.2p(-212)_fw(PstI)    | TGATTACGCCCTGCAGTTCTACAGTCAAATGCTTTAAC   |
| EC1.2p(-192)_fw(PstI)    | TGATTACGCCCTGCAGACGTTTCATGATTAAGTGACTAT  |
| EC1.2p(-183)_fw(PstI)    | TGATTACGCCCTGCAGATTAAGTGACTATTTACCGTC    |
| EC1.2p(-172)_fw(PstI)    | TGATTACGCCCTGCAGTATTTACCGTCAATCCTTTCC    |
| EC1.2p(-152)_fw(PstI)    | TGATTACGCCCTGCAGCCATTCTCCCACTAATCCA      |
| EC1.2p(-132)_fw(PstI)    | TGATTACGCCCTGCAGACTTTTTAATTACTCTTAAATCAC |
| EC1.2p(-112)_fw(PstI)    | TGATTACGCCCTGCAGTCACCACTAAGCTTCGAATC     |
| EC1.2p_rev(BamHI)        | TGCTCACCATGGATCCACTTGTGTTAGAAGCCATTA     |
| EC1.1p(-463)_fw          | caccTGCTTATGATTTCTTCGGTTT                |
| EC1.1p(-326)_fw          | TTCTATTGAACTAAATCAAACGAGTTT              |
| EC1.1p(-192)_fw          | CTAATTATCTCACAATCTAATGAGCTTC             |
| EC1.1p_rev               | TTCTCAACAGATTGATAAGGTCGA                 |
| EC1.2p(-894)_fw          | caccAAGCATTGCGTTTGGTTTATCATTGCG          |
| EC1.2p_rev               | TATTCTTTCTTTTGGGGTTTTTGT                 |
| EC1.3p(-293)_fw          | caCCAATCTTGTATACAATCTTCAAAGTTTCTATA      |
| EC1.3p(-133)_fw          | caccACTAAAAACCATCTTTAATCATAATTA          |
| EC1.3p_rev               | TGTGTTTTCTTTGAAGATTTGTG                  |
| EC1.4p(-263)_fw          | caccGTTGCTCTTGCTGCATCAAATACATA           |
| EC1.4p(-163)_fw          | caccACTAATCATTTACTTTCACTTATCCCT          |
| EC1.4p_rev               | TGGTGTGGTTTTTGTGGGAATTTA                 |
| EC1.5p(-251)_fw          | caccGGGTTTCCATAAAGCCCAATTTAGTT           |
| EC1.5p(-146)_fw          | caacTAATTAATTAACCACGATCACTGTGATAATTAC    |
| EC1.5p_rev               | TGCTTCTTTTGTGTTATGGATTTTTGT              |

| <b>Housekeeping and control genes</b>            |                               |
|--------------------------------------------------|-------------------------------|
| ACT3 (AT3G53750)_fw                              | GATTTGGCATCACACTTTCTACAATG    |
| ACT3 (AT3G53750)_rev                             | GTTCCACCACTGAGCACAATG         |
| ACT8 (AT1G49240)_fw                              | CTCAGGTATTGCAGACCGTATGAG      |
| ACT8 (AT1G49240)_rev                             | CTGGACCTGCTTCATCATACTCTG      |
| UBQ10 (AT4G05320)_fw                             | GGAAAAAGGTCTGACCGACA          |
| UBQ10 (AT4G05320)_rev                            | CTGTTACGGAACCCAATTC           |
| IAA8 for ChIP experiment_fw                      | GAACGTAACACTTGGGTCT           |
| IAA8 for ChIP experiment_rev                     | GTCTTTAGAAGGTAGCAAC           |
| IAA8 RTqPCR_fw                                   | CAATGGCTTCTTCTACTTCG          |
| IAA8 RTqPCR_rev                                  | CCAATCACCGTCTTTATCT           |
| <b>Primers for quantitative PCR</b>              |                               |
| EC1.1_rev                                        | AGTCATTGCCATCACAGTAACC        |
| EC1.1_fw                                         | CTTGTGTACAGGCTCAAGCTTG        |
| EC1.2_fw                                         | GGCTTCTAACACAAGTTTCCTC        |
| EC1.2_rev                                        | ATGACCTCGACGGCTTGACA          |
| EC1.2_rev                                        | CCGAGTTTGGTCTCACCGTT          |
| EC1.2_fw                                         | CTCTTCTCCTCGTTCTCAACG         |
| EC1.4_fw                                         | ATGGCTTCGAACACTACTTTCC        |
| EC1.4_rev                                        | CCATCAGTCCTCCACTTTGG          |
| EC1.5_rev                                        | CGGTTCACTCGTACCGGTTTGA        |
| EC1.5_fw                                         | GACCTTTCATGTCATCACTGTCTG      |
| <b>Yeast constructs</b>                          |                               |
| pAtEC1.11 plus EcoRI_fw                          | CGAATTCTGCCTTATGATTTCTTCGG    |
| pAtEC1.11 plus XbaI_rev                          | CGTCTAGATAATTAGTGGGTCTGTTTAGG |
| pAtEC1.12 plus EcoRI_fw                          | CGAATTCAGACCCACTAATTACG       |
| pAtEC1.12 plus XbaI_rev                          | CGTCTAGACTCAACAGATTGATAAGG    |
| <b>Other primers</b>                             |                               |
| GUS_rev                                          | TCATTGTTTGCCTCCCTGCTG         |
| SUF4-1_fw                                        | GTATGGCAAATGCCACCTC           |
| SUF4-1_rev                                       | CTGAGATTCGTCTGTCTATCGC        |
| TDNA pSKI015 derivative<br>(Dinneny et al. 2004) | CATTTTATAATAACGCTGCGGACATCTAC |
| SUF4 alternative splicing_fw                     | GGGGCTCAGCAACCATCTCAT         |

|                               |                                                     |
|-------------------------------|-----------------------------------------------------|
| SUF4 alternative splicing_rev | ATCCGCCAGCAAGCCTACT                                 |
| SUF4 CDS pENTR-D-TOPO_fw      | CACCATGGGTAAGAAGAAGAAGAG                            |
| SUF4 CDS_rev                  | CTAAAACGCCATCCGCC                                   |
| MOM1.3_fw                     | AAGCAGTTGTCTTCTACCAG                                |
| MOM1.3_rev                    | TTGCCGCTTATTTGCCTAG                                 |
| T-DNA SALK LBb1 primer        | GCGTGGACCGCTTGCTGCAACT                              |
| MOM1 promoter_fw gateway      | GGGGACAAGTTTGTACAAAAAAGCAGGCTGATCGACTCTAAACATTATGGG |
| MOM1 promoter_rev gateway     | GGGGACCACTTTGTACAAGAAAGCTGGGTCATATTCCTGAGAGCACGCAA  |

### **Supplemental table cited literature**

Franco-Zorrilla JM, López-Vidriero I, Carrasco JL, Godoy M, Vera P, Solano R (2014) DNA-binding specificities of plant transcription factors and their potential to define target genes. *Proc Natl Acad Sci USA* 111: 2367-72
